1 **Discovery of a bacterial peptide as a modulator of GLP-1 and metabolic disease**

2

3 **Running title: Novel *S. epidermidis* peptide modulates GLP-1 levels**

4

5 Catherine Tomaro-Duchesneau<sup>1</sup>, Stephanie L. LeValley<sup>1</sup>, Daniel Röth<sup>2</sup>, Liang Sun<sup>3</sup>,  
6 Frank T. Horrigan<sup>3</sup>, Markus Kalkum<sup>2</sup>, Joseph M. Hyser<sup>1</sup>, Robert A. Britton<sup>1\*</sup>

7

8 <sup>1</sup>Department of Molecular Virology and Microbiology, Baylor College of Medicine,  
9 Houston, Texas, United States of America

10 <sup>2</sup>Department of Molecular Imaging and Therapy, Beckman Research Institute of the City  
11 of Hope, Duarte, California, United States of America

12 <sup>3</sup>Department of Molecular Physiology and Biophysics, Baylor College of Medicine,  
13 Houston, Texas, United States of America

14

15 \* Corresponding Author: Robert A. Britton, [robert.britton@bcm.edu](mailto:robert.britton@bcm.edu)

16

17 Word count abstract: 250

18 Word count text: 5077

## 19 **Abstract**

20           Early work in germ-free rodents highlighted the gut microbiota's importance in  
21 metabolic disease, including Type II Diabetes Mellitus (T2DM) and obesity. Glucagon-  
22 like peptide-1 (GLP-1) is an incretin secreted by enteroendocrine L-cells lining the  
23 gastrointestinal epithelium. GLP-1 has important functions including promoting insulin  
24 secretion, insulin sensitivity, and  $\beta$ -cell mass, while inhibiting gastric emptying and  
25 appetite. We set out to elucidate how the microbiota can modulate GLP-1 secretion,  
26 with the goal to identify microbial strains with GLP-1 stimulatory activity as a metabolic  
27 disease therapeutic. Over 1500 human-derived strains were isolated from fecal, breast  
28 milk, and colon and intestinal biopsy samples from healthy individuals. In vitro screening  
29 for GLP-1 modulation was performed by incubating bacterial cell-free supernatants with  
30 NCI H716 human L-cells. Approximately 45 strains capable of increasing GLP-1 levels,  
31 measured by ELISA, were discovered. Interestingly, all positive strains were identified  
32 as *Staphylococcus epidermidis* by 16S rRNA sequencing. Non-GLP-1 stimulatory *S.*  
33 *epidermidis* strains were also identified. Mass spectrometry analysis identified a 3 kDa  
34 peptide, termed GLP-1 stimulating peptide (GspA), present in GLP-1 positive but absent  
35 in GLP-1 neutral *S. epidermidis*. Studies in human L-cells and intestinal enteroids  
36 demonstrated that GspA alone is sufficient to enhance GLP-1 secretion. When  
37 administered in high-fat-fed mice, GspA-producing *S. epidermidis* significantly reduced  
38 markers associated with obesity and T2DM, including adiposity and hyperinsulinemia.  
39 Further characterization of GspA suggests a GLP-1 stimulatory action via calcium  
40 signaling. The presented results identify a novel host-microbe interaction which may

41 ultimately lead to the development of a microbial peptide-based therapeutic for obesity  
42 and T2DM.

43

#### 44 **Importance**

45 The human gastrointestinal microbiota has been shown to modulate metabolic disease,  
46 including Type II Diabetes Mellitus and obesity, through mechanisms involving gut  
47 hormone secretion. We initiated this study to identify bacterial strains that can stimulate  
48 one of these hormones, glucagon-like peptide-1. We first identified that some strains of  
49 *Staphylococcus epidermidis* have such stimulatory activity. We then found that these  
50 strains could be used in a mouse model of high-fat feeding to reduce markers  
51 associated with metabolic disease, including adiposity and elevated insulin levels. We  
52 also identified the peptide from *S. epidermidis* that stimulates glucagon-like peptide-1  
53 and propose a mode of action through calcium signaling. This newly identified microbial-  
54 derived peptide and host-microbe interaction provide a promising therapeutic approach  
55 against Type II Diabetes Mellitus and obesity.

## 56 Introduction

57 Metabolic disorders, including Type 2 Diabetes Mellitus (T2DM) and obesity,  
58 pose a serious public health concern both nationally and globally. According to the  
59 Centers for Disease Control and Prevention (CDC), 9.4% of the population of the United  
60 States has Diabetes, including 25.2% of those aged 65 years or older (1). Obesity is  
61 also a major health concern, with more than one-third of American adults considered  
62 obese (2). Current treatment approaches, including intensive lifestyle modifications, diet  
63 intervention, and pharmacologics, have proven unsuccessful in controlling the global  
64 increase of metabolic disorders. Therefore, a novel approach to combat metabolic  
65 disorders is needed.

66 A number of research groups have recently demonstrated the role of the human  
67 gut microbiota in metabolism and metabolic disease, leading to the attempt to develop  
68 microbial therapeutics. Backhed et al. initially spearheaded this research; using germ-  
69 free rodents, it was demonstrated that when the microbiota of conventionally raised  
70 animals was transplanted into germ-free rodents, the latter developed an increase in  
71 adiposity and insulin resistance (3). Studies by a number of different groups also  
72 demonstrated the importance of the microbiota in metabolism. A recent case report  
73 involving a woman undergoing a fecal microbiota transplant (FMT) for a *Clostridium*  
74 *difficile* infection (CDI) proposed that the donor's "obese phenotype" was transferred to  
75 the patient, suggesting that the rodent observations also apply to humans (4).  
76 Specifically, the gut microbiota has been shown to play an important role in gut  
77 hormone modulation, including GLP-1. Administration of prebiotics, non-digestible food  
78 ingredients that stimulate the growth of specific organisms of the microbiota, increased

79 GLP-1 concentrations, correlating with appetite, fat mass, and hepatic insulin resistance  
80 (5). Samuel et al. demonstrated that n-butyrate, a short-chain fatty acid originating from  
81 the gut microbiota, increased GLP-1 production (6). As well, Yadav et al. demonstrated  
82 an increase in GLP-1 levels in mice following administration of a butyrate-producing  
83 probiotic (7). Everard et al. showed that the abundance of *Akkermansia muciniphila* is  
84 correlated with increased intestinal levels of 2-oleoylglycerol (2-OG), which stimulates  
85 GLP-1 secretion from intestinal L cells in type 2 diabetic mice (8). Specifically, 2-OG has  
86 been shown to be an agonist of GPR119, a receptor that plays a key role in promoting  
87 GLP-1 release in humans. Although promising results have been observed for microbial  
88 therapeutics, a successful therapeutic capable of combatting metabolic disorders,  
89 particularly T2DM and obesity, has yet to be developed. Moreover, the exact role of the  
90 microbiota on GLP-1 modulation remains to be elucidated and investigated as a  
91 therapeutic target. The presented work aims to identify human-derived bacterial strains  
92 capable of stimulating GLP-1 secretion, with the goal of developing a metabolic disease  
93 therapeutic.

94

## 95 **Methods**

### 96 *Bacterial strain isolation*

97 Strains JA1, JB1, JD11, and JA8 were isolated from human breast milk from a  
98 female who had been lactating for four months. Prior to collection, the surface of the  
99 areola was sterilized with 70% (v/v) ethanol wipes. Milk was collected using a freshly-  
100 sterilized adapter and bottle. After collecting 1 mL, the collection bottle was replaced  
101 with a new, sterile bottle and collection continued until natural cessation of milk flow.

102 This latter volume was used for isolation. Bacteria were concentrated from milk by  
103 centrifugation at 1789 X g for 10 min, resuspended in a small volume of supernatant  
104 (whey fraction), and spread plate onto BHIS (JA1, JB1, JA8) or Hyp1 (JD11) plates and  
105 incubated at 37°C in a hypoxic chamber with atmosphere of 2% O<sub>2</sub>, 5% CO<sub>2</sub>, 93% N<sub>2</sub>.  
106 Individual colonies were re-streaked twice on the same agar medium (BHIS or Hyp1) to  
107 ensure homogeneity. The majority of colonies from the second re-streaked plate were  
108 scraped into liquid medium amended with 15% (v/v) glycerol and stored at -80°C.

109

#### 110 *16S rRNA sequencing of isolates*

111 To identify the bacterial isolates, bacteria were streaked on GM17 agar plates  
112 from frozen stock and incubated at 37°C for 1-2 days. Bacterial colony mass was then  
113 resuspended in 100 µL of water and transferred to sterile bead beating tubes and  
114 homogenized for 2 min in a mini-beadbeater-96 (Biospec Products). Tubes were  
115 centrifuged at 8000 xg for 30 secs and supernatants were used for 16S rRNA gene  
116 PCR amplification. The final 25 µL PCR reactions contained 1 µL of template, 1X  
117 Phusion High Fidelity Buffer (New England Biolabs), 200 µM dNTPs (Promega), 10 nM  
118 primers (8F and 1492R) and 0.225 units of Phusion DNA Polymerase (New England  
119 Biolabs). The amplification cycle consisted of an initial denaturation at 98°C for 30s,  
120 followed by 26 cycles of 10 sec at 98°C, 20 secs at 51°C, and 1 min at 72°C.  
121 Amplification was verified by agarose gel electrophoresis. For sample cleanup, 1 µL of  
122 Exo-SAP-IT (ThermoFisher) was added to 2.5 µL of PCR product and incubated at  
123 37°C for 15 min followed by a 15 min incubation at 80°C to inactivate the enzyme. The

124 product was cooled, and 5.5  $\mu$ L of water and 1  $\mu$ L of 10  $\mu$ M 1492R primer were added  
125 and sent to Genewiz for sequencing.

126

### 127 *Bacterial growth and preparation of cell-free supernatants*

128 Bacterial isolates were streaked from frozen glycerol stocks onto GM17 agar  
129 plates and incubated anaerobically overnight at 37°C. One colony was inoculated into 5  
130 mL of GM17 broth and incubated overnight at 37°C followed by one more subculture  
131 into GM17 broth, and incubated overnight at 37°C. Once grown, bacterial cultures were  
132 centrifuged at 5000 x g for 20 min. Supernatants were collected and lyophilized  
133 (Labconco Freezone), followed by storage at -80°C until used for subsequent assays.  
134 For size fractionation studies, bacterial cell-free supernatants were separated by size  
135 using centrifugal filter units (Amicon).

136

### 137 *Screening for GLP-1 stimulatory activity using in vitro enteroendocrine cell models*

138 NCI H716 (American Type Culture Collection (ATCC) CCL-251) cells were grown  
139 in Roswell Park Memorial Institute (RPMI, ATCC) medium supplemented with 10% (v/v)  
140 heat inactivated newborn calf serum (NBCS). Cultures were maintained at a  
141 concentration of  $2-8 \times 10^5$  cells/mL and used at passages 15-40 for cell studies. For cell  
142 studies, 96-well plates were coated with 100  $\mu$ L of 10 mg/mL Matrigel (BD Biosciences)  
143 for 2 h at room temperature. Following coating, NCI H716 cells were seeded at a  
144 concentration of  $1 \times 10^5$  cells/well in Dulbecco's Modified Eagle's Medium (DMEM)  
145 supplemented with 10% (v/v) NBCS, as determined by trypan blue staining using a  
146 hemocytometer. Two days later, lyophilized bacterial supernatants were resuspended in

147 Krebs buffer containing bovine serum albumin (BSA, 0.2% w/v) and bovine bile (0.03%  
148 w/v) and incubated on the NCI H716 cells at 37°C with 5% CO<sub>2</sub>. 4-phorbol 12 myristate  
149 13-acetate (PMA, 2 µM) was used as a positive control as it is a potent stimulator of  
150 GLP-1 secretion through activation of protein kinase C (PKC). Following a 2 h  
151 incubation, supernatants were collected and analyzed for GLP-1 levels by ELISA  
152 (Millipore Sigma) according to the manufacturer's protocol. Cell viability was monitored  
153 using PrestoBlue Cell Viability Reagent (ThermoFisher Scientific) following the  
154 manufacturer's instructions. GLUTag cells were generously gifted by Dr. Colin Leech  
155 (The State University of New York Upstate Medical University). GLUTag cell  
156 experiments were performed following the same protocol as for NCI H716 cells but with  
157 seeding of the cells directly into the 96-well plates, with no need for Matrigel coating due  
158 to their adherent nature.

159

#### 160 *Mouse studies*

161 To investigate whether a GLP-1 stimulating bacterial strain identified in vitro  
162 could have an effect on metabolic disease markers in vivo, we performed a mouse  
163 study. We used 8 week old female C57BL/6 humanized microbiota mice established by  
164 Collins et al. (9). Mice were housed three per cage in a room with controlled  
165 temperature, humidity, and alternating light and dark cycle (12:12 h light/dark cycle).  
166 The two diets were obtained from Research Diets (New Jersey, USA): high fat diet  
167 (D12492) containing 60 kcal% fat and control diet (D12450B) containing 10 kcal% fat.  
168 Mice were randomized by mass into three groups (n = 6): 1) normal fat diet treated with  
169 vehicle (GM17 culture media), 2) high fat diet treated with vehicle, and 3) high fat diet



170 treated with  $2 \times 10^8$  cells/mouse *S. epidermidis* JA1 culture. Mice were allowed free  
171 access to food and water. The experiment lasted for 16 weeks with treatments  
172 administered five times a week by intragastric gavage. Food intake and body mass  
173 were monitored twice a week. Serum was collected every two weeks following 6 h  
174 fasted animals by venous tail bleed for glucose and insulin measurements. Oral glucose  
175 tolerance tests (2 g glucose/kg animal mass) were performed every four weeks. Mice  
176 were euthanized after a 6 h fast by carbon dioxide asphyxiation and blood was drawn  
177 by cardiac puncture. Gonadal adipose mass was dissected and massed as a marker of  
178 adiposity. All experimental protocols were approved by the Animal Ethics Committee of  
179 Baylor College of Medicine.

180

#### 181 *Mass spectrometry analysis of bacterial supernatants*

182 To identify the bacterial compound responsible for GLP-1 stimulation, we  
183 performed mass spectrometry analysis. Lyophilized bacterial supernatants collected  
184 from overnight cultures of two GLP-1 positive strains (JA1 and JA8) and two neutral  
185 strains (JB1 and JD11) were reconstituted in 50  $\mu$ L water. Proteins were denatured by  
186 the addition of trifluoroethanol (50  $\mu$ L), reduced with tris(2-carboxyethyl)phosphine, and  
187 alkylated with iodoacetamide. Samples were diluted with 900  $\mu$ L ammonium  
188 bicarbonate buffer (100 mM) and trypsin/LysC was added. The next day samples were  
189 acidified with formic acid and analyzed on an Orbitrap Fusion mass spectrometer  
190 equipped with an Easy nanospray HPLC system with a PepMap RSLC C18 column  
191 (Thermo Fisher Scientific). Protein identification and relative-quantification by spectra  
192 counting were done using Proteome Discoverer 2.0 (Thermo Fisher Scientific) and

193 Scaffold 4 (Proteome software) using a 1% false discovery rate on the protein and  
194 peptide level.

195

#### 196 *Peptide exposure on NCI H716 cells*

197 To investigate whether the GspA peptide identified by mass spectrometry  
198 recapitulates the GLP-1 stimulatory activity seen with the bacterial supernatants, the  
199 GspA peptide was synthesized as well as the *S. aureus* PsmD and the mutant peptides  
200 24\_25insT and A3Q. GspA (MAADIISTIGDLVKWIIDTVNKFKK), PsmD  
201 (MAQDIISTIGDLVKWIIDTVNKFTKK), 24\_25insT (MAADIISTIGDLVKWIIDTVNKFKK)  
202 and A3Q (MAQDIISTIGDLVKWIIDTVNKFKK) were synthesized by LifeTein (New  
203 Jersey, USA) at 98% purity with an f-Met modified N-terminus. NCI H716 cell  
204 monolayers were prepared as previously described. The four peptides were suspended  
205 in Krebs buffer containing 0.2% w/v BSA and 0.03% w/v bovine bile, at various  
206 concentrations to obtain a dose response curve, and incubated on the NCI H716 cells  
207 for 2 h. GLP-1 levels and cell viability were monitored, as previously described.

208

#### 209 *Calcium signaling in HEK293-GCaMP6s cells*

210 HEK293 were transduced with a lentivirus encoding the GCaMP6s calcium  
211 sensor (HEK293-GCaMP6s) and a stable cell line was selected using 5 µg/mL  
212 puromycin treatment, as previously described (10). For calcium imaging cells were  
213 plated into Greiner Bio-One™ CELLSTAR µClear flat bottomed black 96-well plates  
214 that were coated with poly-D-lysine. Calcium responses to PsmD or GspA were  
215 determined using time-lapse fluorescence microscopy by widefield epifluorescence

216 imaging using a Nikon TiE inverted microscope. Cells were imaged with widefield  
217 epifluorescence using a 20x PlanFluor (NA 0.45) phase contrast objective, using a  
218 SPECTRA X LED light source (Lumencor) for green fluorescence. Images were  
219 acquired with a 100 ms exposure and a 2 second interval between acquisitions, and  
220 images were recorded using an ORCA-Flash 4.0 sCMOS camera (Hamamatsu) and  
221 Nikon Elements v4.5 software was used for data acquisition and image analysis. Cell  
222 were washed and placed in normal Ringer's buffer (160 mM NaCl, 4.5 mM KCl, 2 mM  
223 CaCl<sub>2</sub>, 1 mM MgCl<sub>2</sub>, 10 mM HEPES, pH 7.4) or Low Ca<sup>2+</sup> Ringer's where CaCl<sub>2</sub> was  
224 omitted and 1 mM Ethylenediaminetetraacetic acid (EDTA) added. To determine the  
225 cytosolic Ca<sup>2+</sup> response to PsmD or GspA, baseline fluorescence was measured for 2  
226 minutes and then cells were treated cells with 5 μM peptide and the imaged for 10  
227 minutes. The cytosolic Ca<sup>2+</sup> response was determined as the change in GCaMP6s  
228 fluorescence (ΔFGCaMP6s) from baseline to the maximum post-treatment value.

229

### 230 *Patch clamping of NCI H716 cells*

231 Membrane potentials were recording using the current-clamp mode in the whole-  
232 cell configuration. The pipette solution contained 130 mM KOH, 5 mM KCl, 5 mM NaCl,  
233 1 mM MgCl<sub>2</sub>, 10 mM HEPES, and 1 mM EGTA. The pH was adjusted to 7.2 with MES.  
234 The bath solution contained 5 mM KCl, 135 mM NaCl, 2 mM CaCl<sub>2</sub>, 1 mM MgCl<sub>2</sub>, and  
235 10 mM HEPES. The pH was adjusted to 7.2 with NaOH. 5 μM of GspA or PsmD were  
236 added to the bath solution with a Perfusion Fast-Step (SF-77B) system. Experiments  
237 were performed at room temperature (20-22°C). Data were acquired with an Axopatch  
238 200B amplifier (Axon Instruments Inc.) with the Axopatch's filter set at 100 kHz. Signals

239 were subsequently filtered by an 8-pole Bessel filter (Frequency Device Inc.) at 5 kHz  
240 and sampled at 200 kHz with an 18-bit A/D converter (Instrutech ITC-18).

241

#### 242 *NGN3-HIEs*

243 We recently developed a novel human intestinal enteroid model of  
244 enteroendocrine cells using overexpression of the transcription factor neurogenin-3  
245 (NGN3-HIE) (manuscript submitted). We used the NGN3-HIE model in this work to  
246 investigate whether GspA can stimulate the release of other enteroendocrine cell  
247 molecules. We laid down flat NGN3-HIE monolayers, following the previously described  
248 protocol (manuscript submitted). GspA was suspended in Krebs buffer containing 0.2%  
249 w/v BSA and 0.03% w/v bovine bile, at 20 and 40  $\mu$ M and incubated on the NGN3-HIE  
250 monolayers for 2 h. Cell viability was monitored by PrestoBlue, as previously described.  
251 A Milliplex Multiplex assay was performed using a Luminex kit (Millipore Sigma) to  
252 measure GLP-1, glucagon, PYY and GIP, according to the protocol provided by the  
253 manufacturer. Serotonin secretion was quantified by ELISA (Eagle Biosciences)  
254 according to the manufacturer's instructions.

255

#### 256 *Statistical analysis*

257 Statistical analyses were performed using GraphPad Prism version 7.0 (San  
258 Diego, CA, USA). Experimental results are expressed as means  $\pm$  standard deviation.  
259 Statistical significance was set at  $p < 0.05$ . One-way statistical comparisons were  
260 carried out using one-way analysis of variance (ANOVA), followed by multiple  
261 comparisons of the means using Tukey's post-hoc analysis for the GLP-1 secretion

262 experiments in NCI H716 cells, gonadal adipose mass, fasted insulin levels, calcium  
263 flux and luminex data with the enteroids. Two-way ANOVA analysis was performed for  
264 animal mass, food consumption, and the size fractionation experiments.

265

## 266 **Results**

267 *Screening of a human-derived microbial library for regulation of the incretin hormone*  
268 *GLP-1*

269 In order to identify bacterial strains capable of eliciting GLP-1 secretion, 1500  
270 microbial strains were screened using the GLP-1 secreting human cell line NCI H716  
271 (11). Cell-free supernatants of each microbe were prepared and applied to monolayers  
272 of NCI-H716 cells for 2 hours. GLP-1 secreted into the medium was analyzed by ELISA.  
273 Of the 1500 strains that were screened, the vast majority (>1400) had no positive or  
274 negative impact on GLP-1 secretion. We identified 45 isolates that showed increased  
275 GLP-1 secretion similar to or above stimulation of GLP-1 with the positive control  
276 phorbol 12-myristate 13-acetate (PMA). We also identified 25 strains that dramatically  
277 reduced the level of secreted GLP-1; these strains were not further characterized as  
278 part of this study.

279 16S rRNA sequencing of all 45 stimulatory strains identified them as *S.*  
280 *epidermidis* isolates. We originally isolated most of these strains from either breast milk  
281 or fecal samples from healthy human volunteers. To further characterize the impact of  
282 *S. epidermidis* strains on GLP-1 secretion, we incubated cell-free supernatants from two  
283 of the stimulatory strains with the highest activity, *S. epidermidis* JA1 and JA8. JA1 and  
284 JA8 stimulated a release of  $3155 \pm 276$  pM and  $2518 \pm 141$  pM GLP-1, respectively

285 **(Figure 1A)**. The GM17 media control and the PMA positive control had GLP-1 levels of  
286  $565 \pm 188$  pM and  $1767 \pm 120$  pM GLP-1, respectively, indicating an approximate 1.5-2  
287 fold increase in activity by JA1 over the positive PMA control.

288 To interrogate the robustness of the impact of *S. epidermidis* on GLP-1 secretion,  
289 we confirmed that JA1 and JA8 could stimulate GLP-1 secretion in a widely used GLP-1  
290 secretion model, murine GLUTag cells (12). *S. epidermidis* JA1 and JA8 led to the  
291 release of  $1123 \pm 107$  pM and  $984 \pm 40$  pM GLP-1, respectively **(Figure 1B)**. The GM17  
292 media control and the PMA positive control had GLP-1 levels of  $327 \pm 35$  pM and  $305 \pm$   
293  $14$  pM, respectively, indicating no real stimulation by PMA. These results support the  
294 role of a secreted factor in stimulating the release of GLP-1.

295 Interestingly, two strains (JB1 and JD11) of *S. epidermidis* in our library had no  
296 impact on the ability to stimulate GLP-1 secretion (termed neutral), in both NCI H716  
297 and GLUTag cells. None of the *S. epidermidis* bacterial cell-free supernatants had  
298 detectable toxicity on NCI H716 **(Figure 1C)** and GLUTag **(Figure 1D)** cells, as  
299 determined using PrestoBlue, a resazurin-based viability assay.

300

### 301 *S. epidermidis* JA1 reduces markers of metabolic disease

302 Following identification of JA1 as the strongest stimulator of GLP-1 secretion in  
303 vitro, we investigated its ability to modulate markers of metabolic disease during a 16-  
304 week study in a high-fat model of disease. Mice were placed on a high-fat diet and  
305 gavaged either with *S. epidermidis* JA1 or GM17 medium as a negative control 5 times  
306 per week. Administration of *S. epidermidis* JA1 to HFD-fed mice for 16 weeks reduced  
307 markers of obesity, body mass, and adiposity compared to the GM17 medium control.

308 Mice fed a HFD gained significantly more mass than mice on the conventional diet  
309 during the course of the study, administration of JA1 significantly reduced animal mass  
310 in mice fed a HFD (**Figure 2A**). This significant difference was noted as of day 42 ( $p <$   
311  $0.05$ ), and at every time point for the rest of the study, with animal percent body mass of  
312  $122.6 \pm 13.0 \%$  and  $115.9 \pm 4.7 \%$  for the HFD-fed mice and HFD-fed mice  
313 administered JA1, respectively.

314 Since we hypothesized that *S. epidermidis* JA1 administration enhances the  
315 secretion of GLP-1, a satiety hormone, we also monitored food consumption throughout  
316 the 16 week study (**Figure 2B**). The average food consumption for the HFD-fed mice  
317 was  $13.0 \pm 1.15$  g/week compared to  $12.09 \pm 0.89$  g/week for the HFD-fed mice  
318 administered *S. epidermidis* JA1 ( $p = 0.0082$ ), demonstrating that *S. epidermidis* JA1  
319 reduced food intake. To assess adiposity, the gonadal adipose tissue was measured at  
320 the end of the study (**Figure 2C**). Mice fed a HFD had significantly more ( $p < 0.0001$ )  
321 adipose tissue mass ( $1.72 \pm 0.59$  g) than their LFD-fed counterparts ( $0.28 \pm 0.10$  g).  
322 Administration of *S. epidermidis* JA1 significantly reduced ( $p = 0.004$ ) the levels of  
323 adipose tissue mass ( $0.83 \pm 0.34$  g). *S. epidermidis* JA1 administration in HFD-mice  
324 reduced the levels of fasted hyperinsulinemia. Feeding with a HFD ( $0.75 \pm 0.06$  ng/mL)  
325 significantly elevated ( $p < 0.0001$ ) the levels of fasted serum insulin as compared to  
326 mice administered the LFD ( $0.24 \pm 0.12$  ng/mL) (**Figure 3**). Administration of *S.*  
327 *epidermidis* JA1 ( $0.48 \pm 0.06$  ng/mL) significantly reduced ( $p = 0.0004$ ) fasted serum  
328 insulin levels in HFD-fed mice. Taken together, this data suggests potential for the  
329 modulation of Type II Diabetes and obesity markers by *S. epidermidis* JA1.

330

331 *Identifying the microbial-derived compound responsible for GLP-1 stimulatory activity*

332 To better characterize the bacterial component responsible for GLP-1 secretion  
333 in vitro and for metabolic disease marker modulation in vivo, we performed size  
334 fractionation studies using Amicon centrifuge filtration tubes. We used two GLP-1  
335 stimulatory *S. epidermidis* strains, JA1 and the *S. epidermidis* type strain ATCC 12228,  
336 for these studies. As shown in **Figure 4**, the vast majority of the GLP-1 stimulatory  
337 activity was present in the greater than 100 kDa fraction of the bacterial supernatants  
338 ( $2507 \pm 1000$  pM of GLP-1 for JA1,  $1998 \pm 570$  pM of GLP-1 for ATCC 12228  
339 compared to  $482 \pm 20$  pM in the media control) with little remaining activity in the less  
340 than 100 kDa fractions ( $752 \pm 625$  pM of GLP-1 for JA1,  $545.3 \pm 363.5$  pM of GLP-1 for  
341 ATCC 12228, compared to  $487 \pm 182$  pM for the media control) and no activity in the  
342 less than 3 kDa fraction ( $410 \pm 131$  pM of GLP-1 for JA1,  $347 \pm 85$  pM of GLP-1 for  
343 ATCC 12228 compared to  $482 \pm 20$  pM in the media control). We also determined that  
344 the bacterial component is completely resistant to heat exposure (100°C for 30 min) and  
345 Proteinase K treatment (50 µg/mL for 1 h).

346 To further identify the component responsible for the activity, we analyzed  
347 trypsinized bacterial supernatants by LC/MS using an Orbitrap Fusion mass  
348 spectrometer equipped with an Easy Nanospray HPLC system. Analysis of the GLP-1  
349 stimulatory and neutral *S. epidermidis* supernatants identified 269 protein groups, of  
350 which none were detected in the GM17 medium control. A secreted peptide, with amino  
351 acid sequence MAADIISTIGDLVKWIIDTVNKFKK and a size of 3 kDa was detected in  
352 the form of two trypsin-digested peptides (**Suppl. Fig 1**) in the GLP-1 stimulatory *S.*  
353 *epidermidis* supernatants of JA1 and JA8 but absent in the GLP-1 neutral strains, JB1



354 and JD11. This GLP-1 stimulatory peptide (subsequently termed GspA) was shown to  
355 have sequence homology to PsmD from *Staphylococcus aureus*, a phenol soluble  
356 modulin that forms a multimeric complex in cell membranes (13). Previous work on  
357 PsmD has shown that it self-aggregates and was originally purified as a 270kD protein  
358 complex, consistent with observation of the 3 kDa peptide having an activity present in  
359 the greater than 100 kDa fraction.

360       Sequence alignment between *S. aureus* PsmD and *S. epidermidis* GspA  
361 revealed two amino acid differences between GspA and PsmD: a substitution of alanine  
362 for glutamine at position 3 (A3Q) and a deletion of a threonine at position 25  
363 (24\_25insT), yielding a 25 amino acid GspA vs 26 amino acid PsmD. We synthesized  
364 all four peptides based on the GspA background to assess the impact of the changes  
365 compared to *S. aureus* PsmD: GspA, PsmD, A3Q, and 24\_25insT. Incubation of the  
366 synthesized peptides on NCI H716 cells confirmed that GspA possesses GLP-1  
367 stimulatory activity ( $1552.0 \pm 134.1$  pM GLP-1 with 20  $\mu$ M GspA compared to  $227.9 \pm$   
368  $10.0$  pM GLP-1 for the media control) (**Figure 5**). In addition, this activity is sequence  
369 specific as it is greatly reduced in the *S. aureus* peptide PsmD ( $706.8 \pm 52.6$  pM GLP-1  
370 with 20  $\mu$ M peptide) as well as in one of the variants, A3Q ( $584.6 \pm 56.1$  pM GLP-1 with  
371 20  $\mu$ M peptide). Interestingly, the 24\_25insT variant retained GLP-1 stimulatory activity  
372 ( $1478.8 \pm 238.1$  pM GLP-1 with 20  $\mu$ M peptide).

373

374 *GspA can modulate intracellular calcium levels*

375       We hypothesized that GspA may be stimulating the release of GLP-1 by altering  
376 calcium signalling. To investigate this possibility, we used HEK293 cells stably

377 expressing a genetically-encoded calcium sensor GCaMP6S, which exhibits increased  
378 green fluorescence upon an increase in cytosolic calcium levels (14). Using the  
379 HEK293-GCaMP6S cell line, we found that treatment with 5  $\mu$ M GspA induced a strong  
380 increase in cytoplasmic calcium, as shown by the levels of green fluorescence signal  
381 following exposure to the peptide (**Figure 6A**). The increase in cytosolic calcium  
382 induced by GspA was significantly greater than that induced by PsmD, which highlights the  
383 functional differences between these two peptides. Extracellular calcium was important  
384 for the GspA-induced increase in cytoplasmic calcium because EDTA chelation of  
385 extracellular calcium significantly reduced the calcium flux (**Figure 6B**). Calcium influx  
386 through the plasma membrane would induce an increase in the membrane voltage,  
387 depolarizing the membrane potential. Thus, we performed current clamp  
388 electrophysiology studies to measure changes in the membrane voltage upon treatment  
389 with PsmD or GspA. We found that GspA induced a rapid and significant depolarization  
390 of NCI H716 cells, but PsmD treatment did not alter the membrane potential (**Figure**  
391 **6C**). Taken together, this data suggests that GspA may be stimulating GLP-1 release  
392 *via* a calcium-dependent mechanism.

393

#### 394 *GspA's effect on the release of other enteroendocrine cell molecules*

395 We further wanted to investigate the specificity of GspA's activity and its ability to  
396 stimulate the release of other enteroendocrine cell molecules. We have developed a  
397 novel human enteroid model using overexpression of Neurogenin-3 (a transcription  
398 factor that stimulates enteroendocrine cell differentiation, giving rise to higher  
399 enteroendocrine cell counts and GLP-1 levels). Using this model with GspA, there was

400 no visible effect on cell viability, as measured by a resazurin-based assay (**Figure 7A**),  
401 indicating that GspA is having no toxic impact on cells. As with validation of the GLUTag  
402 and NCI H716 GLP-1 data, GspA did indeed enhance GLP-1 secretion in the enteroid  
403 model (**Figure 7B**). Interestingly, GspA exposure also stimulated the release of another  
404 gastrointestinal molecule, serotonin (**Figure 7C**). Conversely, GspA did not stimulate  
405 the release of glucagon (**Figure 7D**), peptide YY (**Figure 7E**), or gastric inhibitory  
406 peptide (**Figure 7F**). Taken together, this data suggests specificity in GspA's  
407 mechanism of action for the release of gastrointestinal hormones, not simply as a non-  
408 specific pore-forming complex.

409

## 410 **Discussion**

411 Regulation of intestinal hormones and physiology by microbes and microbial  
412 metabolites offers a novel approach to guide intestinal and systemic health. We  
413 targeted the incretin hormone GLP-1 due to its well-established impact on satiety and  
414 hyperglycemia, described in detail in a recent review (15). Indeed, treatment of type 2  
415 diabetes with GLP-1 receptor agonists, including FDA-approved exenatide and  
416 liraglutide, have demonstrated significant reductions in hyperglycemia, haemoglobin  
417 A1c, and body weight (16). Previous studies have identified the gut microbiota as a key  
418 component in the regulation of GLP-1 secretion, although the mechanisms of action and  
419 organisms responsible for this activity have not been well-defined (17). In this work, we  
420 initially aimed to identify human-derived microbial strains capable of promoting GLP-1  
421 secretion. Despite extensive screening of over 1500 strains, we were able to  
422 demonstrate significant specificity for GLP-1 release by identifying only strains of *S.*

423 *epidermidis*, isolated from either breast milk or fecal samples of healthy donors, that  
424 possess this activity.

425 *S. epidermidis* is an indigenous member of the skin microbiota as well as the  
426 intestinal microbiota of infants and plays a key role for the proper education of the  
427 immune system at the skin surface (18, 19). However, much less is known about how *S.*  
428 *epidermidis* impacts the intestinal tract and gut function. Much of the work on *S.*  
429 *epidermidis* has focused on its role as a pathogen, often identified as a cause of  
430 catheter acquired infections. Thus *S. epidermidis* has traditionally been thought of as an  
431 opportunistic pathogen or a “pathobiont”. However, more recent work has suggested  
432 that *S. epidermidis*, unlike its more sinister cousin *S. aureus*, does not possess bona  
433 fide virulence factors or toxins and has been referred to as an “accidental pathogen”  
434 (20).

435 The strongest GLP-1 stimulator strain in vitro, *S. epidermidis* JA1, a human  
436 breast-milk isolate, reduced weight gain and fat accumulation in HFD-fed mice over the  
437 course of a long-term 16-week study. The reduction in weight and adiposity was  
438 associated with a marked decrease in food intake, a function controlled by secretion of  
439 GLP-1. In our humanized microbiota mice we did not observe a statistically significant  
440 increase in fasted glycemia between the high-fat and control diet mice and thus we  
441 cannot assess the role of *S. epidermidis* JA1 on type 2 diabetes (although we note the  
442 *S. epidermidis* group trended toward a lower fasted glycemia, as seen in the control  
443 mice (**Supp. Fig 2**)). Nevertheless, the observed resistance to HFD-induced  
444 hyperglycemia by the humanized microbiota mice that is typically observed in  
445 conventional C57BL/6 mice is of interest for further investigations. Regardless, we did

446 observe a significant change in the fasted serum insulin levels with the *S. epidermidis*  
447 group, dramatically lowering fasted insulin levels. This indicates that *S. epidermidis*  
448 treatment impacts hyperinsulinemia, a key driver of insulin resistance, metabolic  
449 syndrome, and other disorders including cardiomyopathy (21). Unfortunately we were  
450 unsuccessful, despite many different attempts and strategies, to consistently measure  
451 serum GLP-1 levels in mice in this experiment or other positive control experiments.  
452 Thus, we cannot show that the improved health of the animals correlates with increased  
453 levels of GLP-1 in vivo and will likely need to move to a larger animal model to address  
454 this question.

455         The identification of GspA (PsmD in *S. aureus*) as the factor responsible for the  
456 secretion of GLP-1 allowed us to further investigate how this 25 amino acid peptide  
457 impacts cell physiology. Importantly, we have shown that despite only two amino acid  
458 differences between GspA and PsmD, these peptides have dramatically different effects  
459 on host cell physiology. PsmD, a member of the phenol soluble modulins, has been  
460 studied in *S. aureus* and has many possible roles in host-pathogen interactions,  
461 including host colonization (22). At high levels, PsmD causes lysis of red blood cells and  
462 for this reason and has also been described as delta-hemolysin. GspA does not have  
463 this activity and indeed, *S. epidermidis* strains isolated in this study do not possess  
464 haemolytic activity as *S. aureus* does (**Supp. Fig 3**). Other functions of GspA, including  
465 release of GLP-1 and induction of cytosolic calcium signaling, are not recapitulated by  
466 PsmD. Although additional studies are needed, we suspect that the increase in  
467 intracellular calcium is linked with release of GLP-1, as calcium is a key regulator of  
468 GLP-1 secretion from enteroendocrine cells.

469            Interestingly, during the initial experiments identifying *S. epidermidis* strains with  
470 the ability to stimulate the secretion of GLP-1 in vitro, we also identified two strains of *S.*  
471 *epidermidis* without stimulatory activity, and without GspA detectable by mass  
472 spectrometry. By whole genome sequencing and comparative analysis of two GLP-1  
473 stimulatory and two GLP-1 neutral *S. epidermidis* strains, we demonstrated that the  
474 *gspA* gene is present and homologous in all of the sequenced *S. epidermidis* strains,  
475 regardless of GLP-1 stimulatory activity. However, we identified a single nucleotide  
476 polymorphism (SNP) (**Supp. Fig 4**) in the *agrA* gene of the neutral strains. AgrA is part  
477 of an autoregulatory quorum-sensing system that controls the expression of GspA. In *S.*  
478 *aureus*, a mutation in *agrA* leads to a loss in hemolytic activity (23), and we hypothesize  
479 that the identified SNP in the GLP-1 neutral *S. epidermidis* strains accounts for the  
480 absence of GspA production and thus, GLP-1 stimulatory activity.

481            *S. epidermidis* is an interesting conundrum for microbiome researchers in that it  
482 clearly is a mutualistic organism that provides health benefits for the host including  
483 immune regulation and as a barrier to skin pathogens. Indeed, GspA has been directly  
484 linked to enhancing the properties of the defensin LL-37 against the skin pathogen  
485 Group A *Streptococcus* (19). However, most of the research conducted on the species  
486 has involved its role in pathogenesis, not as a microbial therapeutic. Although the  
487 research community should consider the use of non-traditional microbial strains as  
488 therapeutics, with proper safety characterization of course, future studies may aim to  
489 develop GspA as a peptide-therapeutic, independent of *S. epidermidis*. Added microbial  
490 therapeutic potential may exist in the expression of *gspA* in an organism like

491 *Lactobacillus reuteri*, which already has inherent therapeutic properties, has Generally  
492 Recognized as Safe status, and is suitable for delivery to the gastrointestinal tract.

493 **Acknowledgments**

494 We would like to acknowledge Dr. Pradip Saha and the Mouse Metabolism Core at  
495 Baylor College of Medicine for the help and guidance performing the mouse studies.  
496 Funding supported by Fonds de recherche santé Québec (C.T.D.). This work was  
497 supported in part by NIH grants K01DK093657, R03DK110270, and Baylor College of  
498 Medicine seed funding.

499

500 **Author contributions**

501 CTD conceived, designed and performed the experiments, analyzed data and wrote the  
502 manuscript. SLV performed the in vitro and mouse experiments and edited the  
503 manuscript. DR performed the mass spectrometry analysis. LS performed the patch  
504 clamping experiments. FTR designed the patch clamping experiments. MK designed  
505 and analyzed the mass spectrometry results and edited the manuscript. JMH designed  
506 and performed experiments relating to calcium signaling, analyzed data and helped  
507 write the manuscript. RAB conceived and designed the experiments and wrote the  
508 manuscript.

509

510 **Competing interests**

511 The authors declare no competing financial interests.



## 512 References

- 513
- 514 1. 2017. National Diabetes Statistics Report, 2017. Centers for Disease Control  
515 and Prevention,
- 516 2. 2015. Prevalence of Obesity Among Adults and Youth: United States, 2011–  
517 2014. Centers for Disease Control and Prevention,
- 518 3. Bäckhed F, Manchester JK, Semenkovich CF, Gordon JI. 2007. Mechanisms  
519 underlying the resistance to diet-induced obesity in germ-free mice. *Proceedings*  
520 *of the National Academy of Sciences* 104:979-984.
- 521 4. Alang N, Kelly CR. Weight gain after fecal microbiota transplantation, p. *In* (ed),  
522 Oxford University Press,
- 523 5. Delzenne NM, Neyrinck AM, Bäckhed F, Cani PD. 2011. Targeting gut  
524 microbiota in obesity: effects of prebiotics and probiotics. *Nature Reviews*  
525 *Endocrinology* 7:639.
- 526 6. Samuel BS, Shaito A, Motoike T, Rey FE, Backhed F, Manchester JK, Hammer  
527 RE, Williams SC, Crowley J, Yanagisawa M. 2008. Effects of the gut microbiota  
528 on host adiposity are modulated by the short-chain fatty-acid binding G protein-  
529 coupled receptor, Gpr41. *Proceedings of the National Academy of Sciences*  
530 105:16767-16772.
- 531 7. Yadav H, Lee J-H, Lloyd J, Walter P, Rane SG. 2013. Beneficial metabolic  
532 effects of a probiotic via butyrate-induced GLP-1 hormone secretion. *Journal of*  
533 *Biological Chemistry* 288:25088-25097.
- 534 8. Everard A, Belzer C, Geurts L, Ouwerkerk JP, Druart C, Bindels LB, Guiot Y,  
535 Derrien M, Muccioli GG, Delzenne NM. 2013. Cross-talk between *Akkermansia*  
536 *muciniphila* and intestinal epithelium controls diet-induced obesity. *Proceedings*  
537 *of the National Academy of Sciences* 110:9066-9071.
- 538 9. Collins J, Auchtung JM, Schaefer L, Eaton KA, Britton RA. 2015. Humanized  
539 microbiota mice as a model of recurrent *Clostridium difficile* disease. *Microbiome*  
540 3:35.
- 541 10. Perry JL, Ramachandran NK, Utama B, Hyser JM. 2015. Use of genetically-  
542 encoded calcium indicators for live cell calcium imaging and localization in virus-  
543 infected cells. *Methods* 90:28-38.
- 544 11. Cao X, Flock G, Choi C, Irwin DM, Drucker DJ. 2003. Aberrant regulation of  
545 human intestinal proglucagon gene expression in the NCI-H716 cell line.  
546 *Endocrinology* 144:2025-2033.
- 547 12. Drucker DJ, Jin T, Asa SL, Young TA, Brubaker PL. 1994. Activation of  
548 proglucagon gene transcription by protein kinase-A in a novel mouse  
549 enteroendocrine cell line. *Molecular endocrinology* 8:1646-1655.
- 550 13. Verdon J, Girardin N, Lacombe C, Berjeaud J-M, Hechard Y. 2009.  $\delta$ -hemolysin,  
551 an update on a membrane-interacting peptide. *Peptides* 30:817-823.
- 552 14. Chen T-W, Wardill TJ, Sun Y, Pulver SR, Renninger SL, Baohan A, Schreiter  
553 ER, Kerr RA, Orger MB, Jayaraman V. 2013. Ultrasensitive fluorescent proteins  
554 for imaging neuronal activity. *Nature* 499:295.
- 555 15. Drucker DJ. 2018. Mechanisms of action and therapeutic application of  
556 glucagon-like peptide-1. *Cell metabolism* 27:740-756.

- 557 16. Drucker DJ, Nauck MA. 2006. The incretin system: glucagon-like peptide-1  
558 receptor agonists and dipeptidyl peptidase-4 inhibitors in type 2 diabetes. *The*  
559 *Lancet* 368:1696-1705.
- 560 17. Everard A, Cani PD. 2014. Gut microbiota and GLP-1. *Reviews in Endocrine and*  
561 *Metabolic Disorders* 15:189-196.
- 562 18. Grice EA, Segre JA. 2011. The skin microbiome. *Nature Reviews Microbiology*  
563 9:244.
- 564 19. Cogen AL, Yamasaki K, Sanchez KM, Dorschner RA, Lai Y, MacLeod DT,  
565 Torpey JW, Otto M, Nizet V, Kim JE. 2010. Selective antimicrobial action is  
566 provided by phenol-soluble modulins derived from *Staphylococcus epidermidis*, a  
567 normal resident of the skin. *Journal of Investigative Dermatology* 130:192-200.
- 568 20. Otto M. 2009. *Staphylococcus epidermidis*—the 'accidental' pathogen. *Nature*  
569 *Reviews Microbiology* 7:555.
- 570 21. Jia G, DeMarco VG, Sowers JR. 2016. Insulin resistance and hyperinsulinaemia  
571 in diabetic cardiomyopathy. *Nature Reviews Endocrinology* 12:144.
- 572 22. Cheung GY, Joo H-S, Chatterjee SS, Otto M. 2014. Phenol-soluble modulins—  
573 critical determinants of staphylococcal virulence. *FEMS microbiology reviews*  
574 38:698-719.
- 575 23. Nicod SS, Weinzierl RO, Burchell L, Escalera-Maurer A, James EH,  
576 Wigneshweraraj S. 2014. Systematic mutational analysis of the LytTR DNA  
577 binding domain of *Staphylococcus aureus* virulence gene transcription factor  
578 AgrA. *Nucleic acids research* 42:12523-12536.

579

## 580 Figure legends

581 **Figure 1:** Glucagon-like peptide-1 levels are stimulated following exposure to cell-free  
582 *S. epidermidis* supernatants for 2 hours using **(A)** NCI H716 and **(B)** GLUTag cells,  
583 measured by ELISA. *S. epidermidis* supernatants did not impact the cell viability of **(C)**  
584 NCI H716 and **(D)** GLUTag cells, measured using a resazurin-based PrestoBlue assay  
585 (\*\* $p < 0.001$ ).

586  
587 **Figure 2:** Administration of *S. epidermidis* JA1 decreased **(A)** animal mass, **(B)** food  
588 consumption and **(C)** gonadal adiposity at the end of the 16 week study in mice  
589 administered a high-fat diet ( $*p < 0.05$ ,  $**p < 0.01$ ,  $***p < 0.001$ ).

590  
591 **Figure 3:** Administration of *S. epidermidis* JA1 significantly reduced fasted serum  
592 insulin levels at the end of the 16 week study ( $***p < 0.001$ ).

593  
594 **Figure 4:** Size fractionation of *S. epidermidis* supernatants on GLP-1 secretion by NCI  
595 H716 cells demonstrates that the GLP-1 stimulatory activity is present in the  $> 100$  kDa  
596 fraction.

597  
598 **Figure 5:** GLP-1 stimulatory activity of GspA, PsmD and the two mutants, 24\_25insT  
599 and A3Q at varying concentrations using NCI H716 cells demonstrates activity by the  
600 GspA and 24\_25insT peptides with reduced activity by *S. aureus* PsmD and the A3Q  
601 peptides.

602  
603 **Figure 6:** The role of GspA on calcium signalling. **(A)** Fluorescence microscopy imaging  
604 of GspA on intracellular calcium flux using HEK 293 GCaMP6S cells exposed to GspA  
605 and *S. aureus* PsmD demonstrates greater intracellular calcium levels in cells exposed  
606 to GspA. **(B)** Quantification of calcium flux in the HEK 293 GCaMP6S cells confirms  
607 these results. **(C)** Patch clamp of NCI H716 cells exposed to GspA undergo significant  
608 cell depolarization as compared to those exposed to PsmD control peptide ( $**p < 0.01$ ).

609  
610 **Figure 7:** GspA exposure on neurogen-3 transduced human intestinal enteroids  
611 demonstrates specificity in its activity. GspA exposure did not lead to a loss of **(A)** cell  
612 viability as determined by a resazurin-based PrestoBlue assay. GspA did enhance the  
613 secretion of **(B)** GLP-1 and **(C)** serotonin but not **(D)** glucagon, **(E)** Peptide-YY, and **(F)**  
614 gastric inhibitory peptide ( $***p < 0.001$ ).

615 **Supplemental legends**

616

617 **Suppl Fig 1:** Two trypsin-derived GspA peptides, M(ox)AADIISTIGDLVK and  
618 WIIDTVNK with mass over charge (m/z) ratios of 731.90 and 494.78 were identified,  
619 which resulted in a 88% coverage of GspA (MAADIISTIGDLVKWIIDTVNKFKK). MS/MS  
620 spectra and fragmentation tables of (A) the peptide M(ox)AADIISTIGDLVK with an  
621 oxidized methionine at the first position and (B) the peptide WIIDTVNK.

622

623 **Suppl Fig 2:** Effect of administration of *S. epidermidis* JA1 on fasted serum glucose at  
624 the end of a 16 week study.

625

626 **Suppl Fig 3:** Testing hemolytic activity of (A) *S. epidermidis* JA1 and (B) *S. aureus*  
627 using sheep's blood agar plates demonstrates no hemolysis by *S. epidermidis*.

628

629 **Suppl Fig 4:** Identification of a SNP in accessory gene regulator A (*agrA*) in the GLP-1  
630 neutral (JB1 and JD11) vs. the GLP-1 stimulatory (JA6 and JA8) *S. epidermidis* strains.

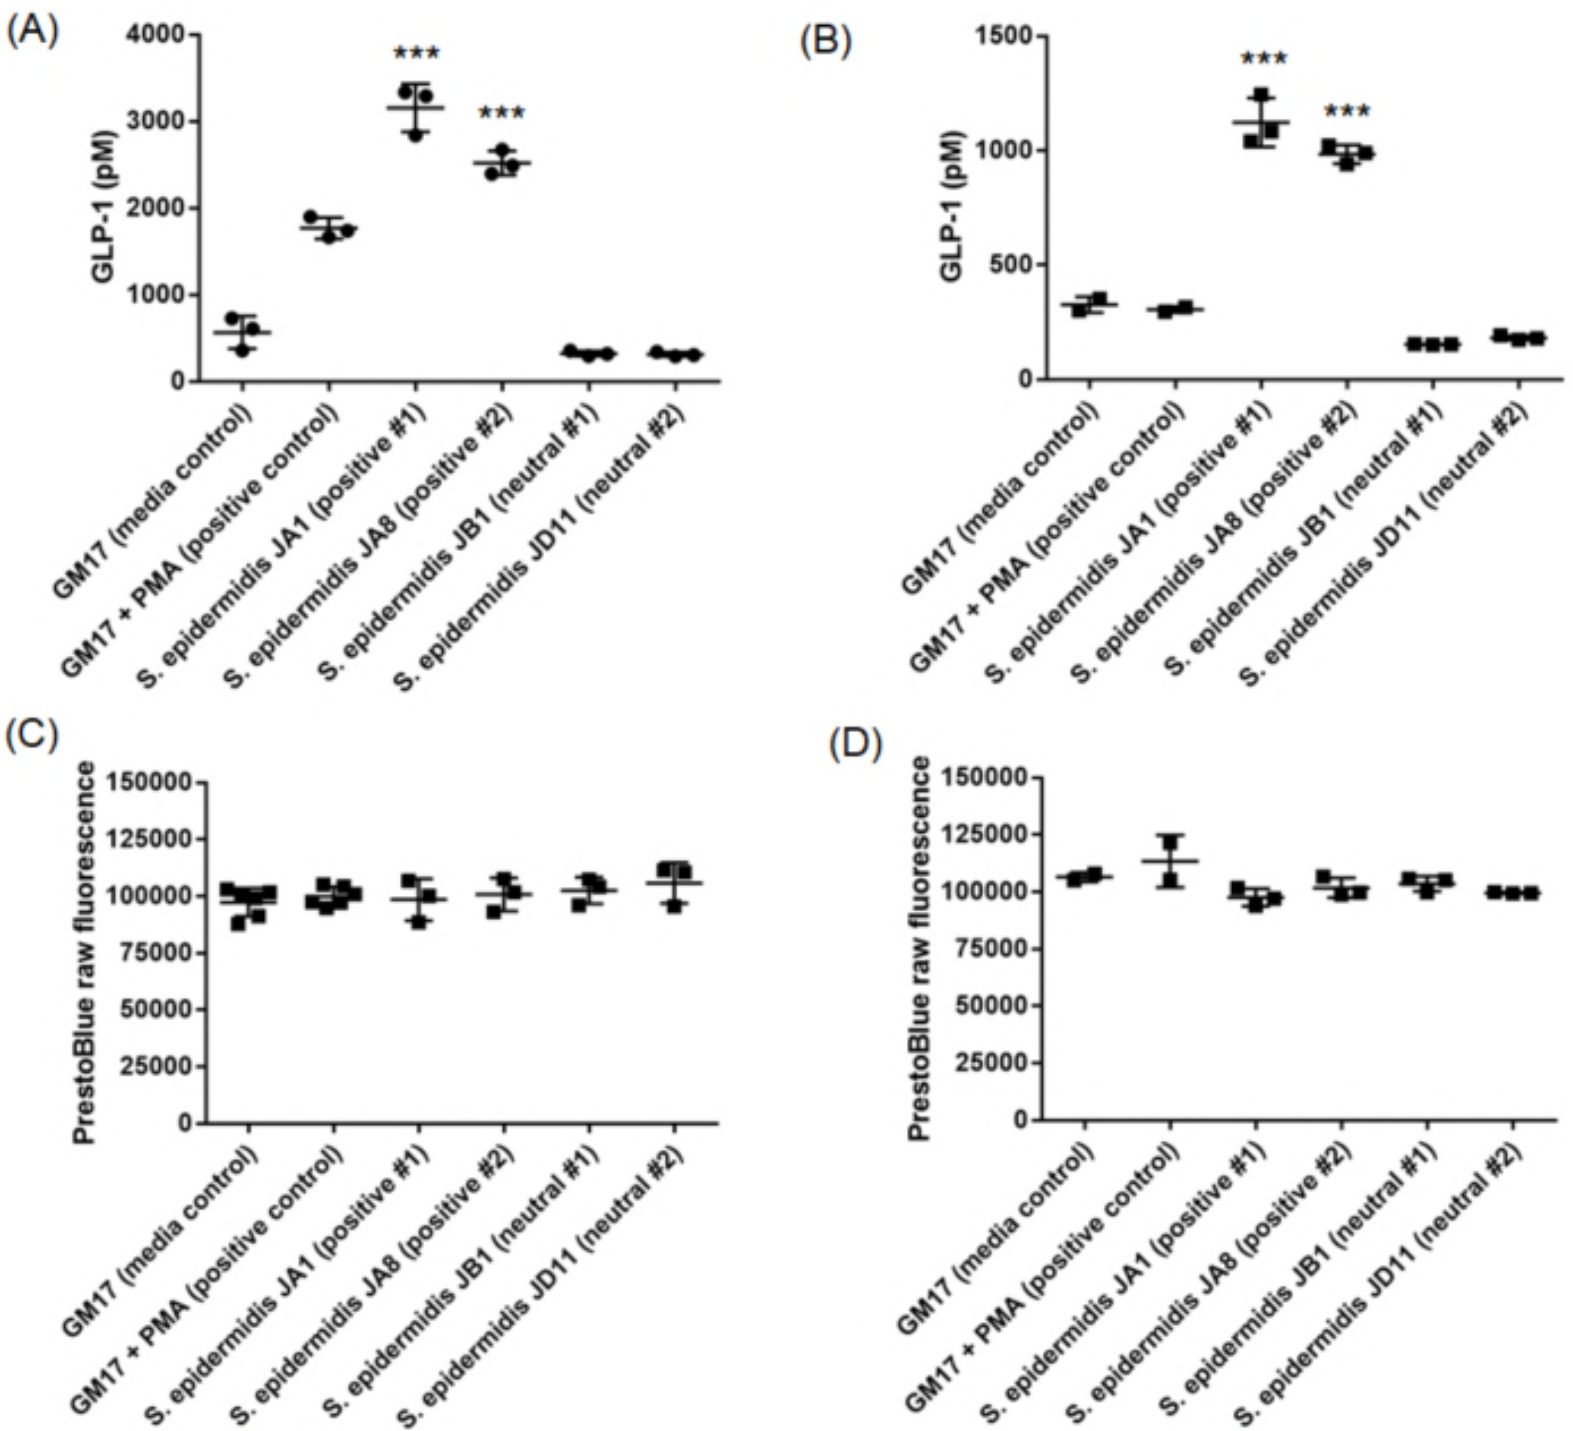

**Figure 1:** Glucagon-like peptide-1 levels are stimulated following exposure to cell-free *S. epidermidis* supernatants for 2 hours using (A) NCI H716 and (B) GLUTag cells, measured by ELISA. *S. epidermidis* supernatants did not impact the cell viability of (C) NCI H716 and (D) GLUTag cells, measured using a resazurin-based PrestoBlue assay (\*\*\*)  $p < 0.001$ .

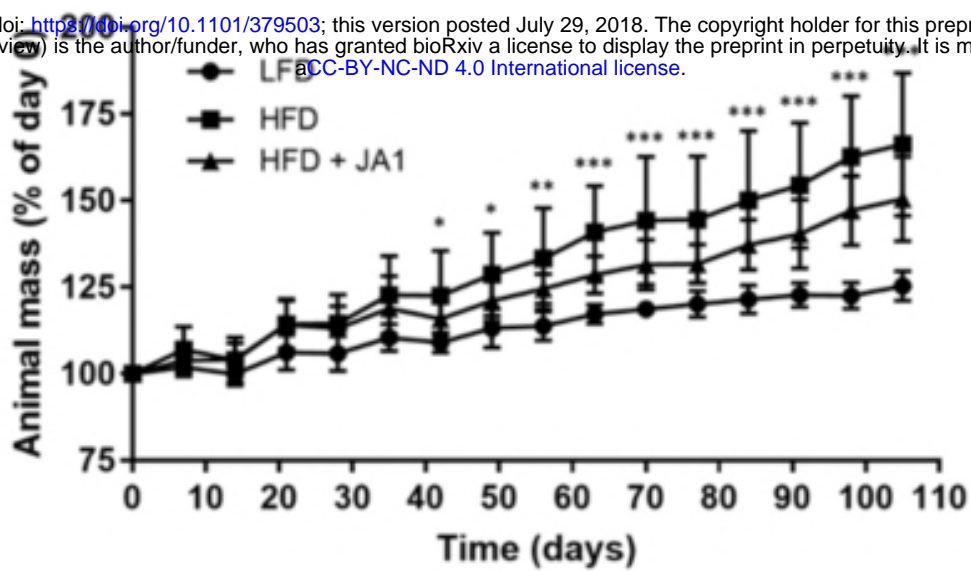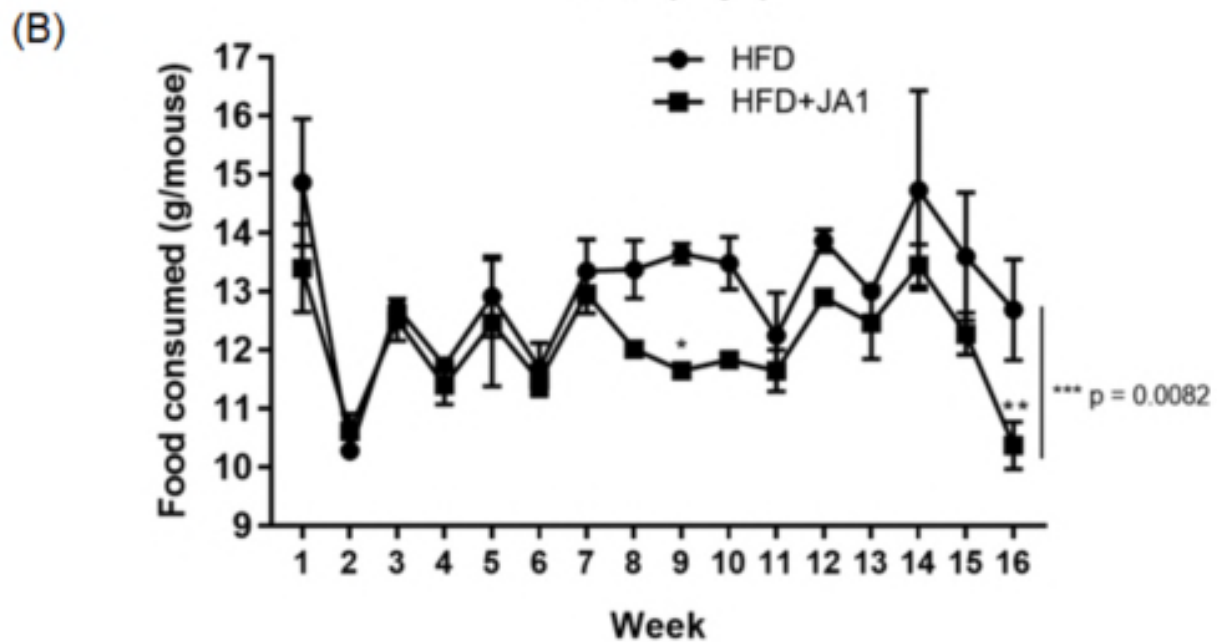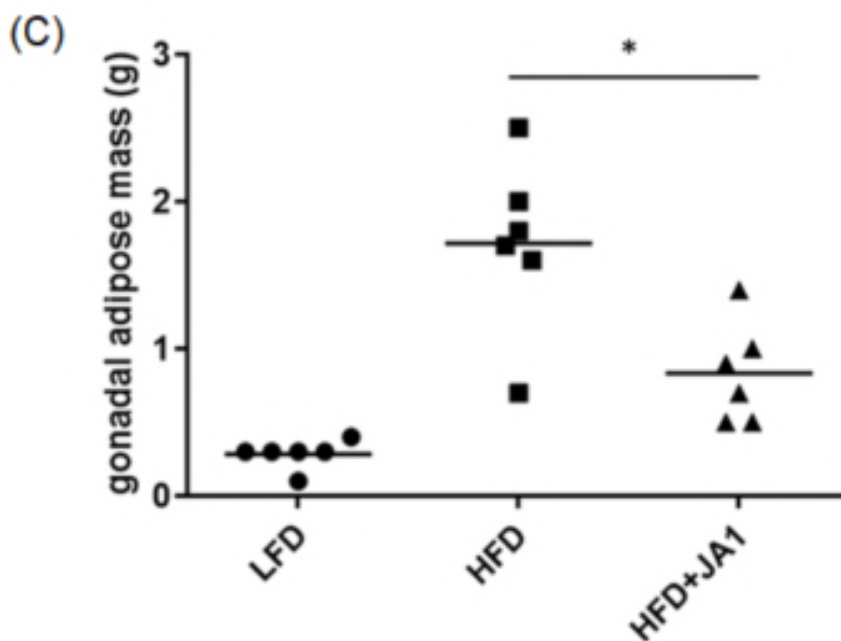

**Figure 2:** Administration of *S. epidermidis* JA1 decreased (A) animal mass, (B) food consumption and (C) gonadal adiposity at the end of the 16 week study in mice administered a high-fat diet (\* $p < 0.05$ , \*\* $p < 0.01$ , \*\*\* $p < 0.001$ ).

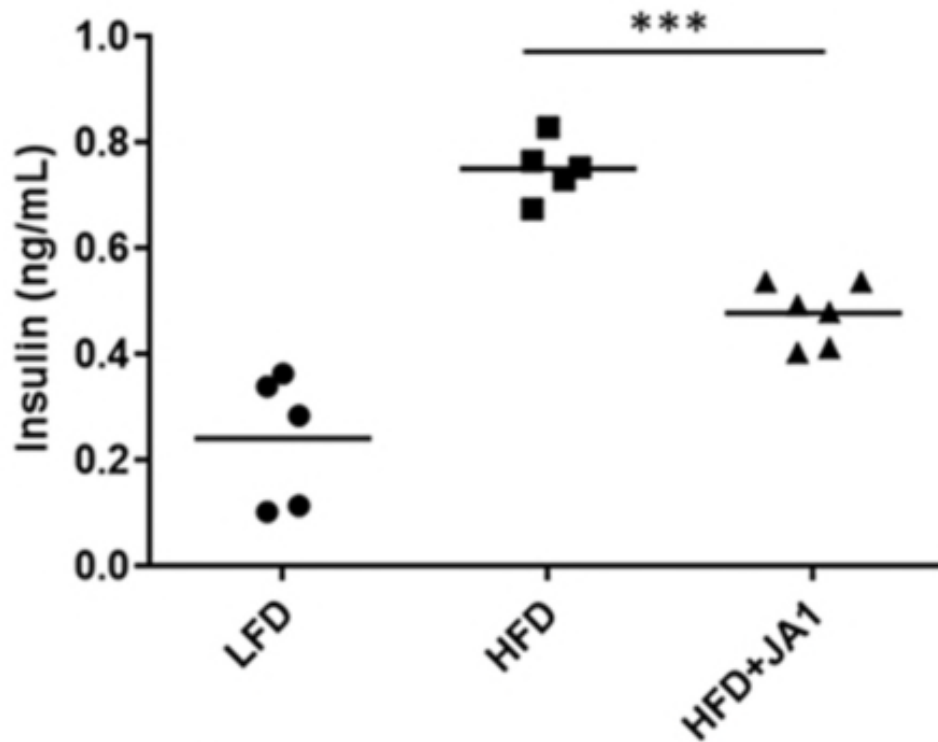

**Figure 3:** Administration of *S. epidermidis* JA1 significantly reduced fasted serum insulin levels at the end of the 16 week study (\*\* $p < 0.001$ ).

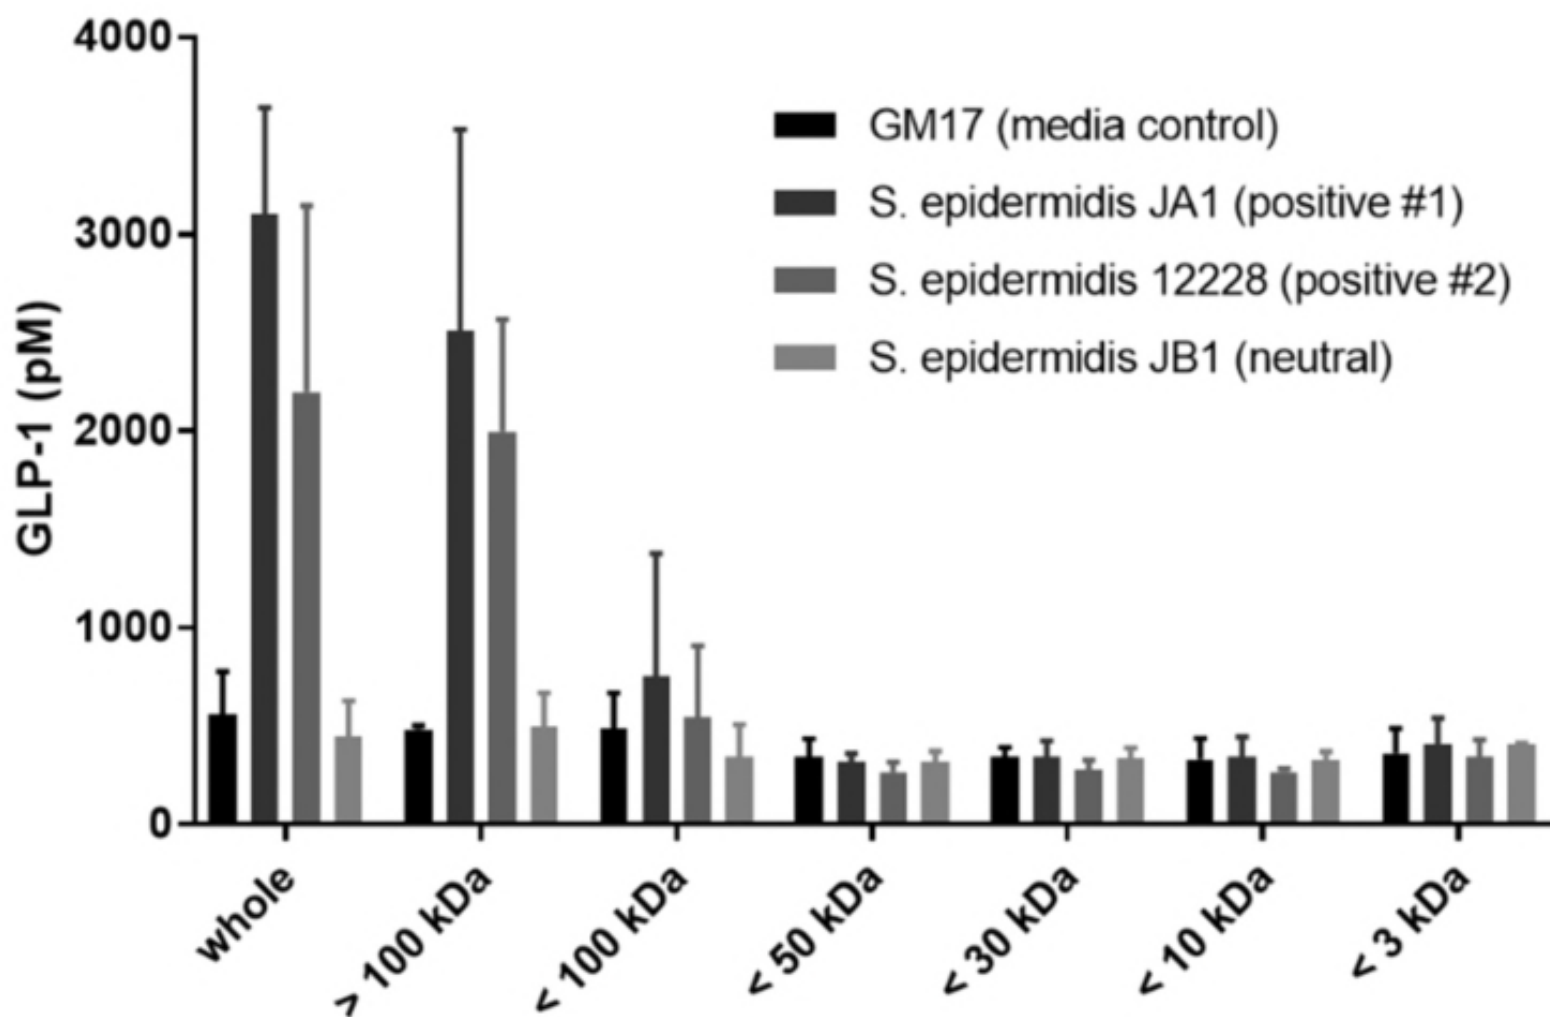

**Figure 4:** Size fractionation of *S. epidermidis* supernatants on GLP-1 secretion by NCI H716 cells demonstrates that the GLP-1 stimulatory activity is present in the > 100 kDa fraction.



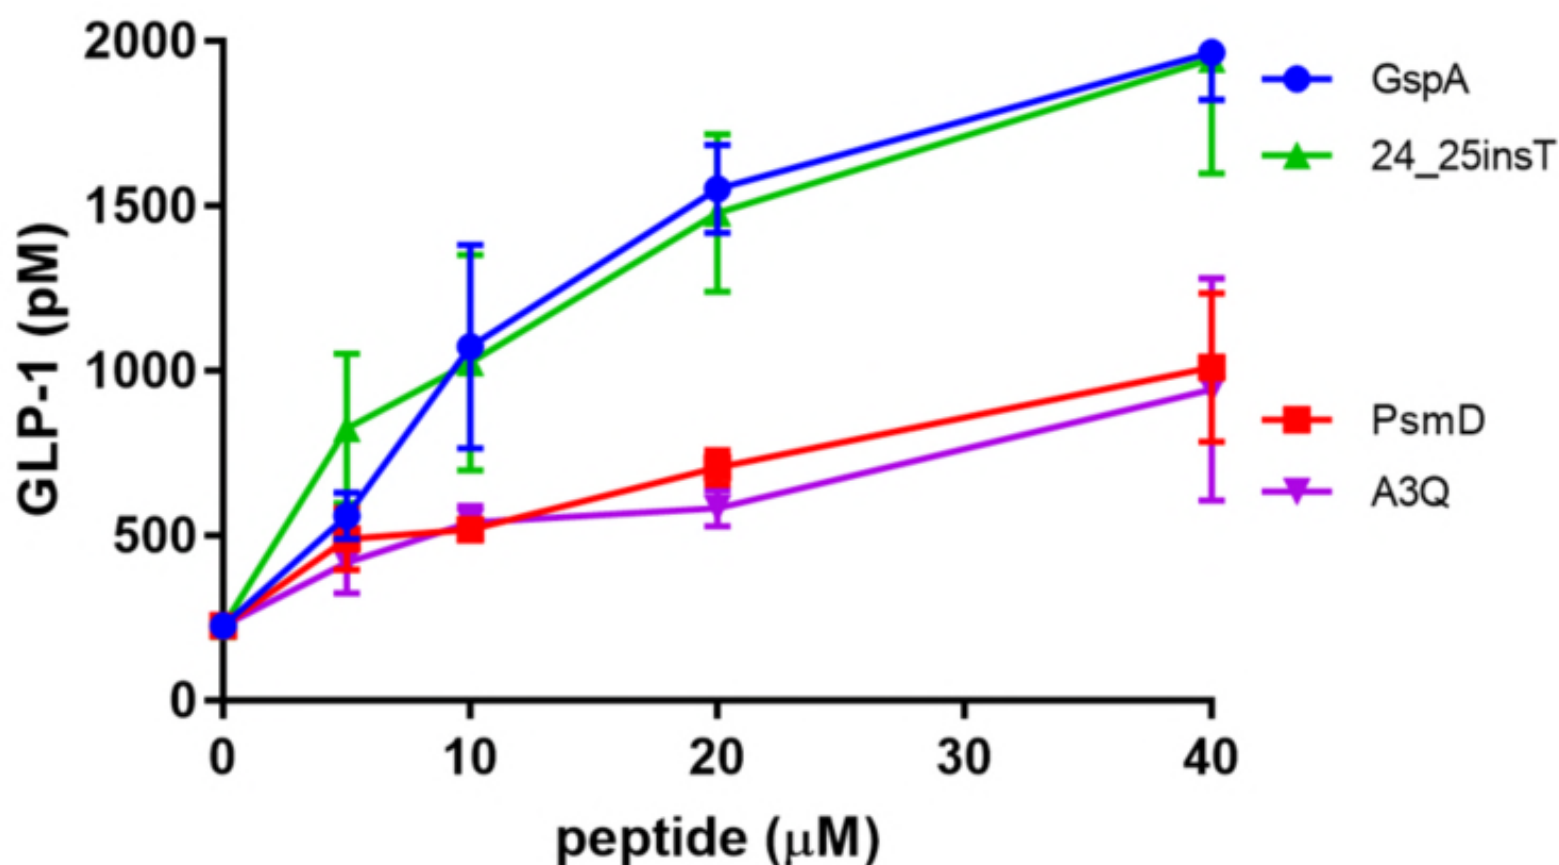

**Figure 5:** GLP-1 stimulatory activity of GspA, PsmD and the two mutants, 24\_25insT and A3Q at varying concentrations using NCI H716 cells demonstrates activity by the GspA and 24\_25insT peptides with reduced activity by *S. aureus* PsmD and the A3Q peptides.

(A)

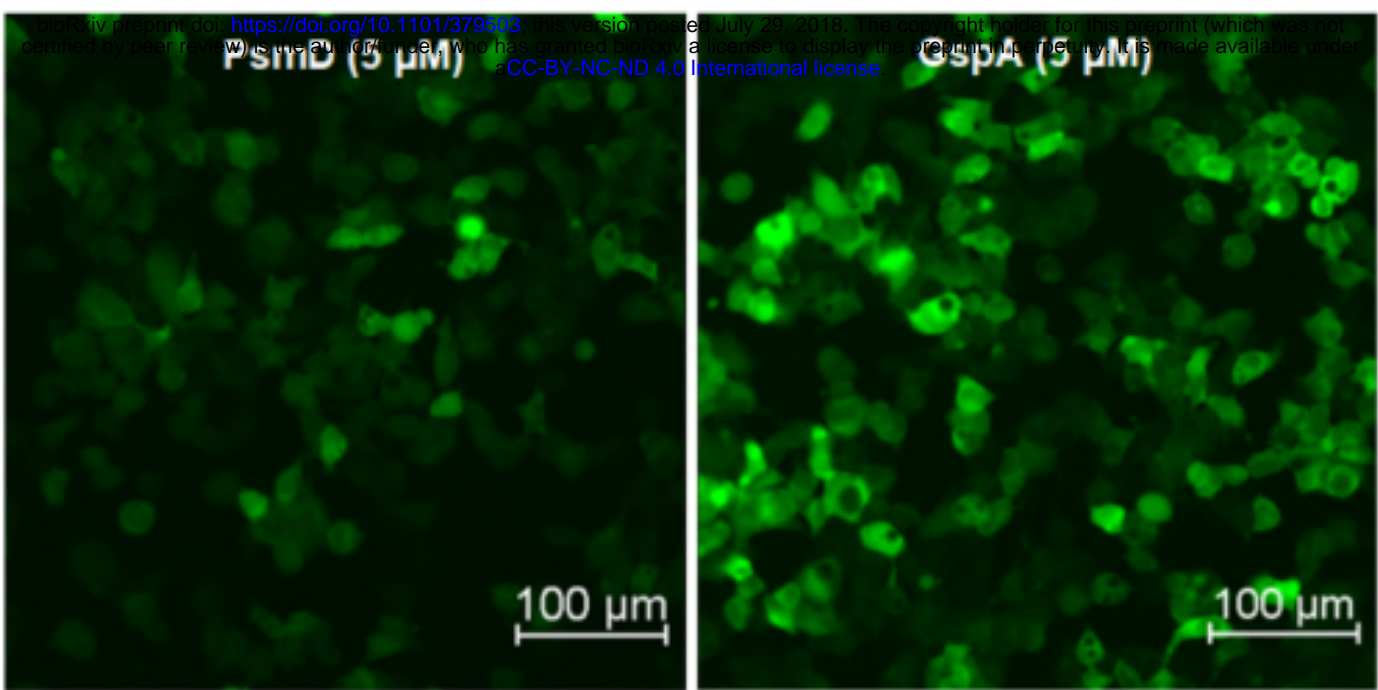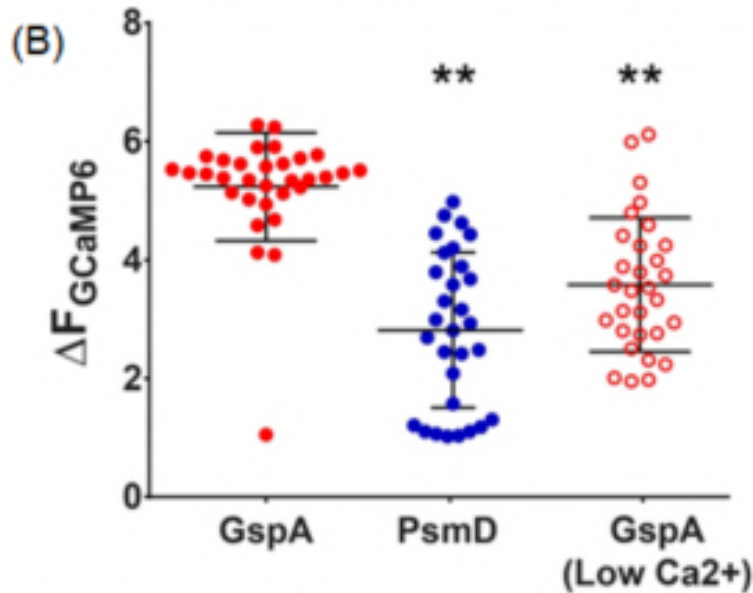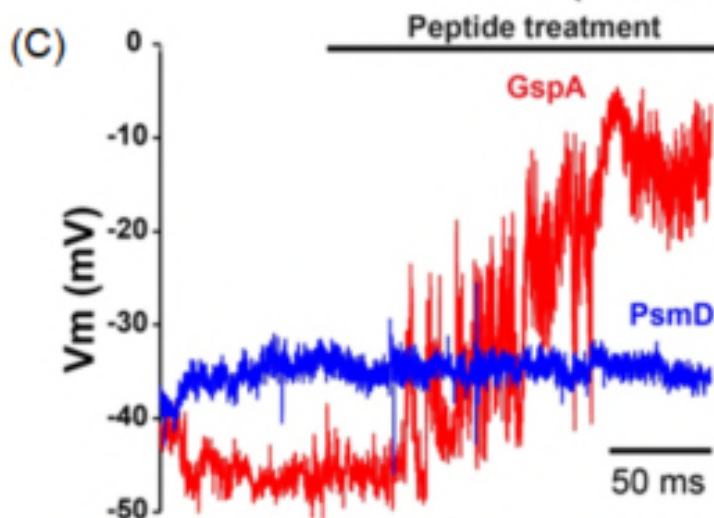

**Figure 6:** The role of GspA on calcium signalling. (A) Fluorescence microscopy imaging of GspA on intracellular calcium flux using HEK 293 GCaMP6S cells exposed to GspA and *S. aureus* PsmD demonstrates greater intracellular calcium levels in cells exposed to GspA. (B) Quantification of calcium flux in the HEK 293 GCaMP6S cells confirms these results. (C) Patch clamp of NCI H716 cells exposed to GspA undergo significant cell depolarization as compared to those exposed to PsmD control peptide (\*\* $p < 0.01$ ).

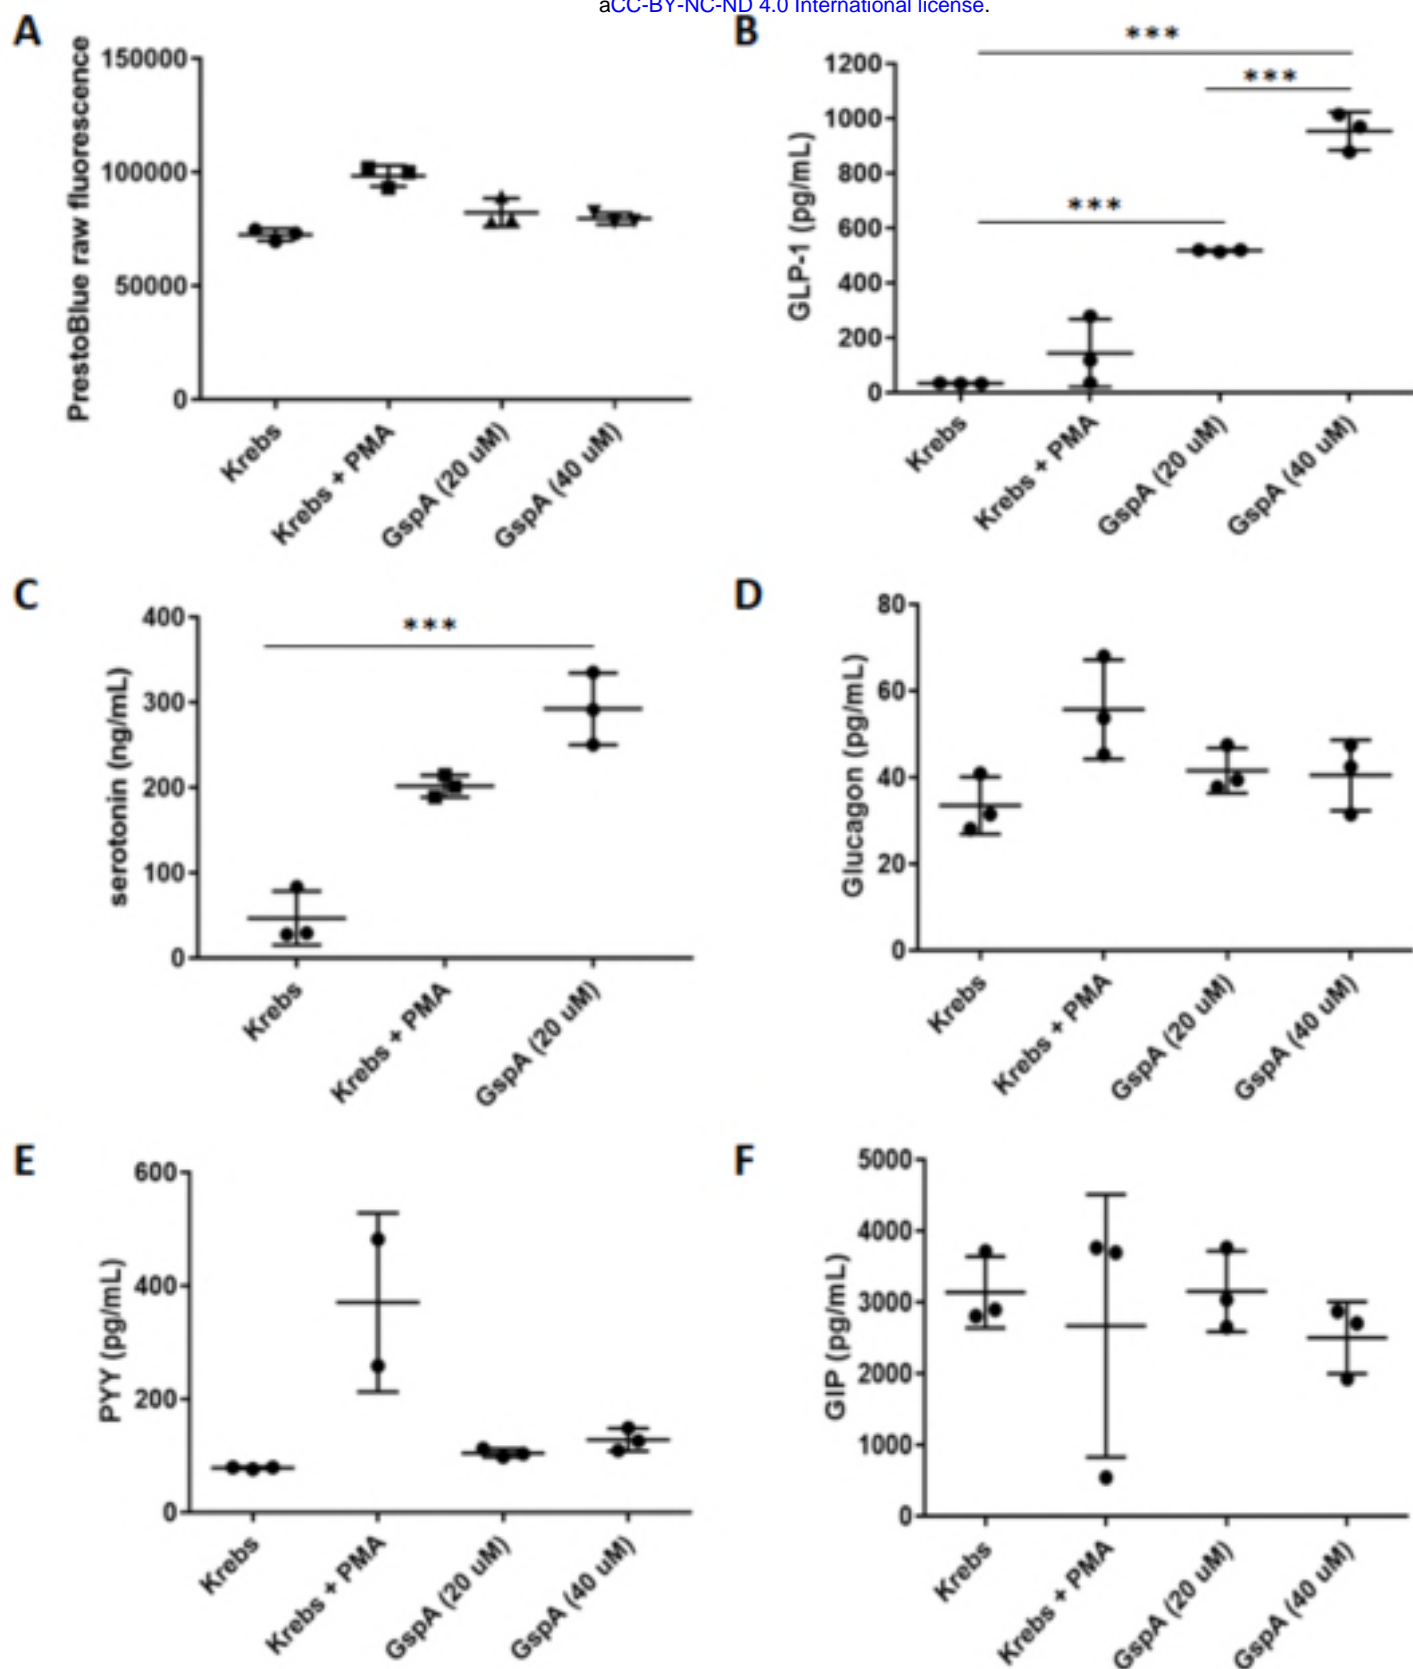

**Figure 7: GspA exposure on neurogen-3 transduced human intestinal enteroids demonstrates specificity in its activity. GspA exposure did not lead to a loss of (A) cell viability as determined by a resazurin-based PrestoBlue assay. GspA did enhance the secretion of (B) GLP-1 and (C) serotonin but not (D) glucagon, (E) Peptide-YY, and (F) gastric inhibitory peptide (\*\*\*)  $p < 0.001$ .**
